# Supplementary material for: Biodiesel Production Using a Banana Peel Extract-Mediated Highly Basic Heterogeneous Nanocatalyst
Source: MDPI journal article supplement (doi:10.3390/su151411332), 2023-07-20
Supplement: s1 [file s1]

**Table of contents:**

| <b>Sl No</b> | <b>Caption</b>                                                                  | <b>Graphic</b> |
|--------------|---------------------------------------------------------------------------------|----------------|
| 1.           | FT-IR spectra of the biodiesel product showing different peak positions         | Figure S1      |
| 2.           | $^1\text{H}$ -NMR and $^{13}\text{C}$ -NMR analysis of the biodiesel product    | Figure S2      |
| 3.           | Gas chromatography analysis of the biodiesel product                            | Figure S3      |
| 4.           | Optimization of reaction parameters                                             | Figure S4      |
| 5.           | Heterogeneity test of the CaO catalyst in transesterification of soybean        | Figure S5      |
| 6.           | SEM and EDX images of reused catalyst                                           | Figure S6      |
| 7.           | FT-IR spectrum of reused CaO catalyst after 5 reaction cycles                   | Figure S7      |
| 8.           | XPS deconvolution spectra of magnesium (Mg1s), silicon (Si2p), phosphorus (P2p) | Figure S8      |

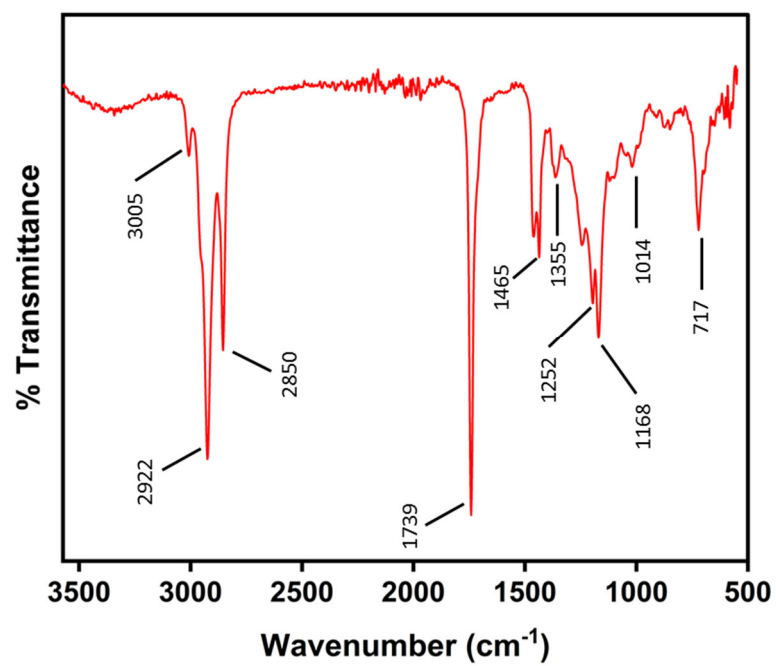

**Figure S1.** FT-IR spectra of the biodiesel product showing different peak positions.

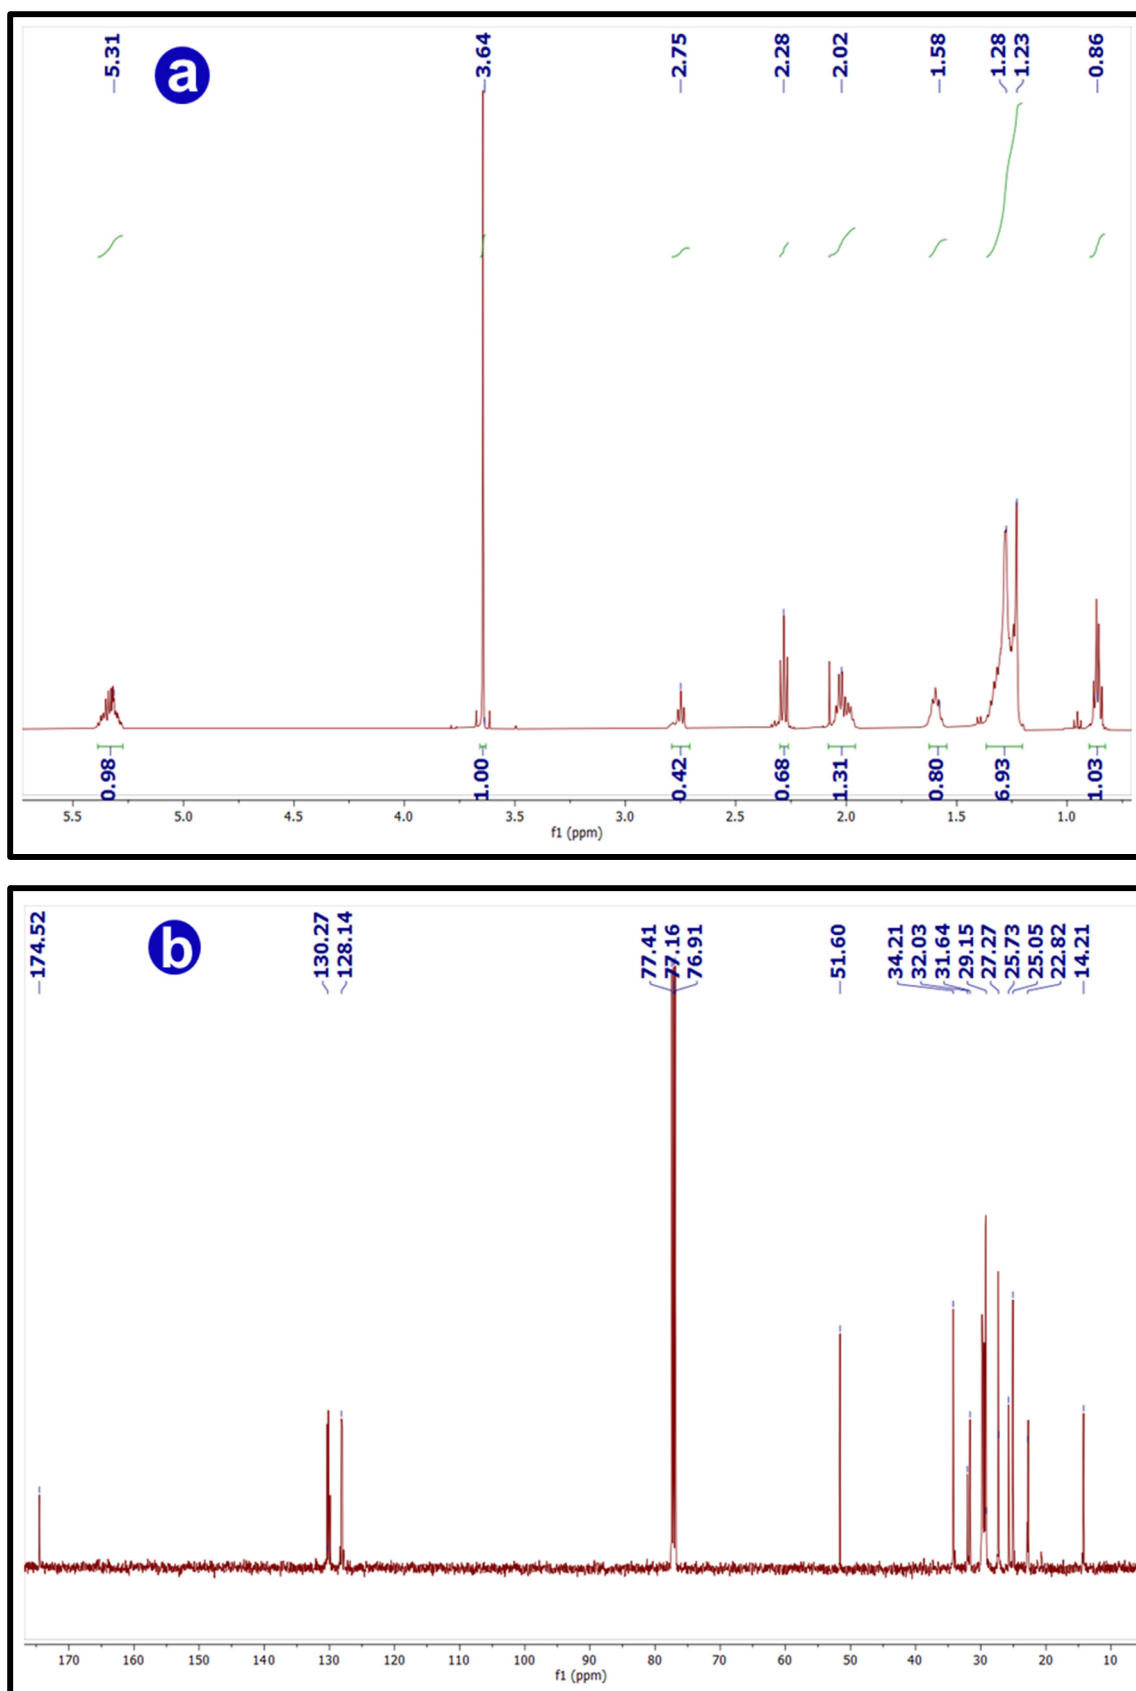

Figure S2. (a)  $^1\text{H}$ -NMR and (b)  $^{13}\text{C}$ -NMR analysis of the biodiesel product.

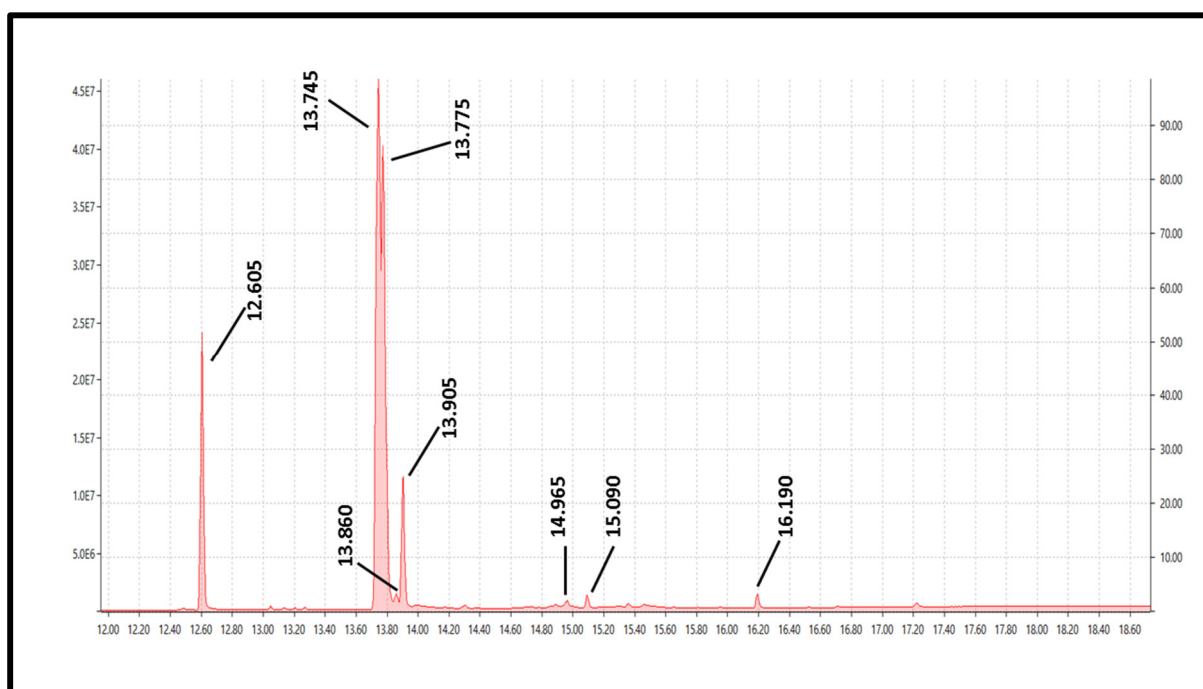

**Figure S3.** Gas chromatography analysis of the biodiesel product.

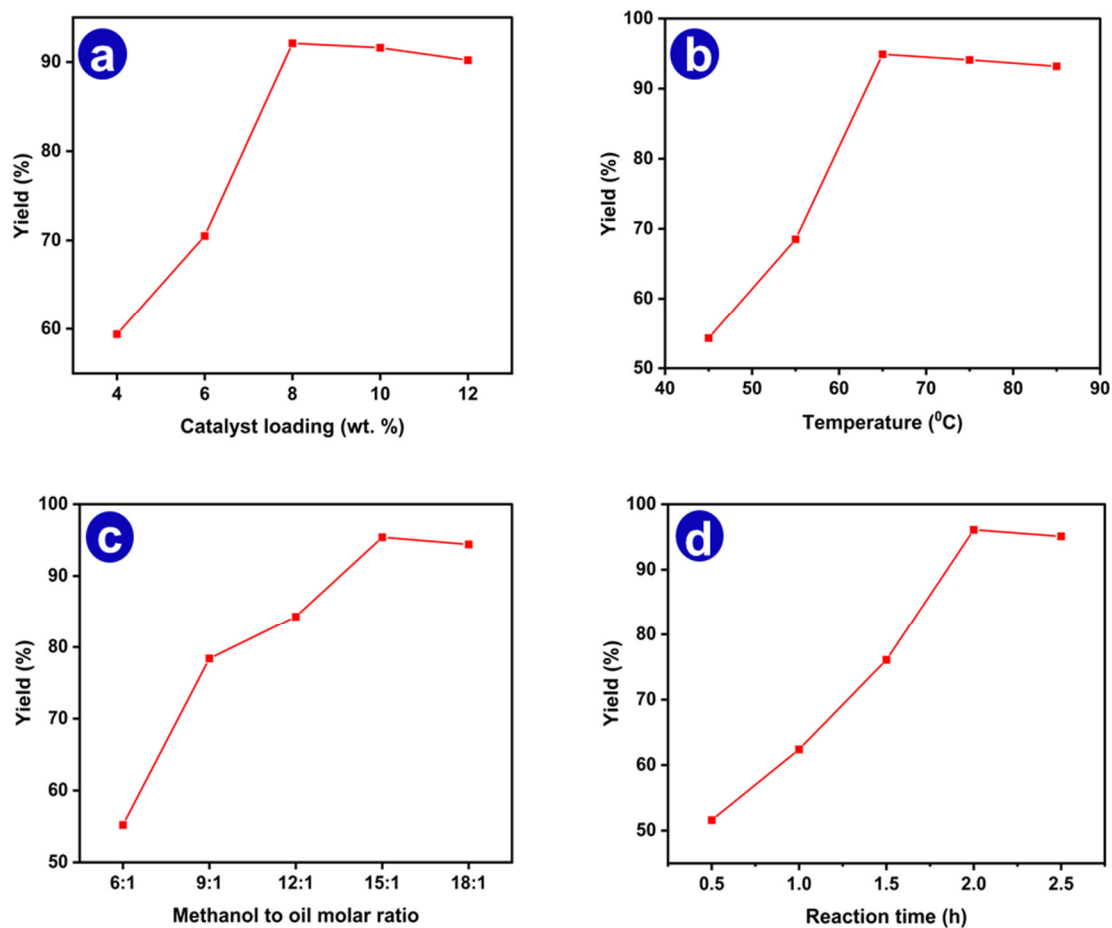

**Figure S4.** Influence of one reaction parameter on biodiesel yield keeping the other three parameters fixed: (a) influence of catalyst loading, (b) influence of temperature, (c) influence of MTOR, and (d) influence of reaction time

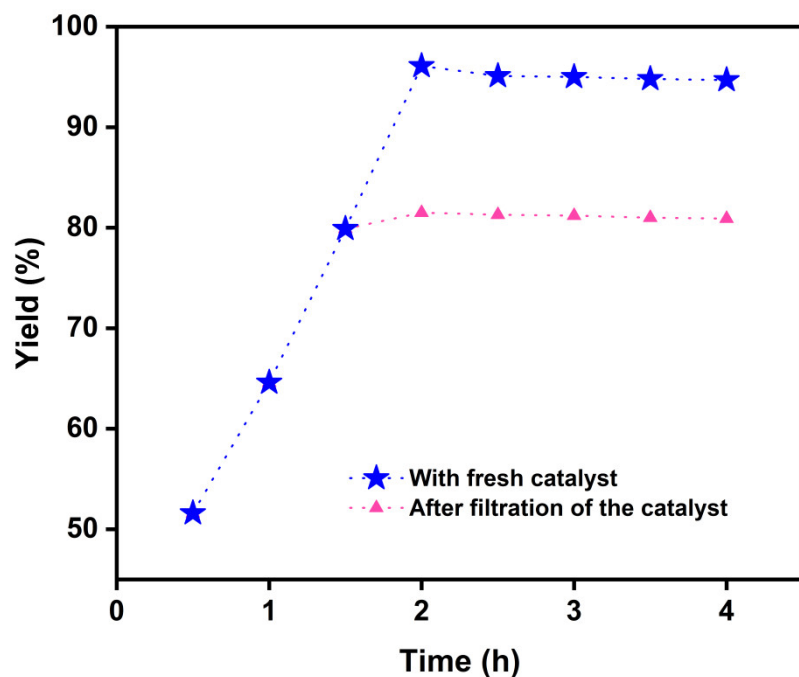

**Figure S5.** Heterogeneity test of the CaO catalyst in transesterification of soybean.

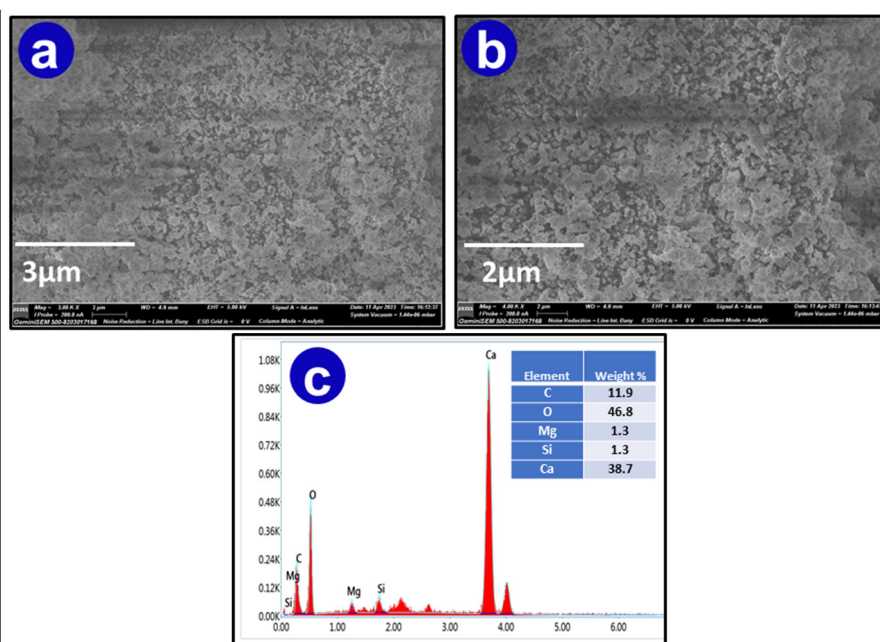

**Figure S6.** Scanning electron microscopy analysis of reused CaO catalyst after 5 cycles: Representative SEM images (**a**,**b**). Respective scale bars and magnifications: (**a**) 3  $\mu\text{m}$ , 3.00 kx (**b**) 2 $\mu\text{m}$ , 4.00 kx; (**c**) the EDX spectrum with elemental composition (inset).

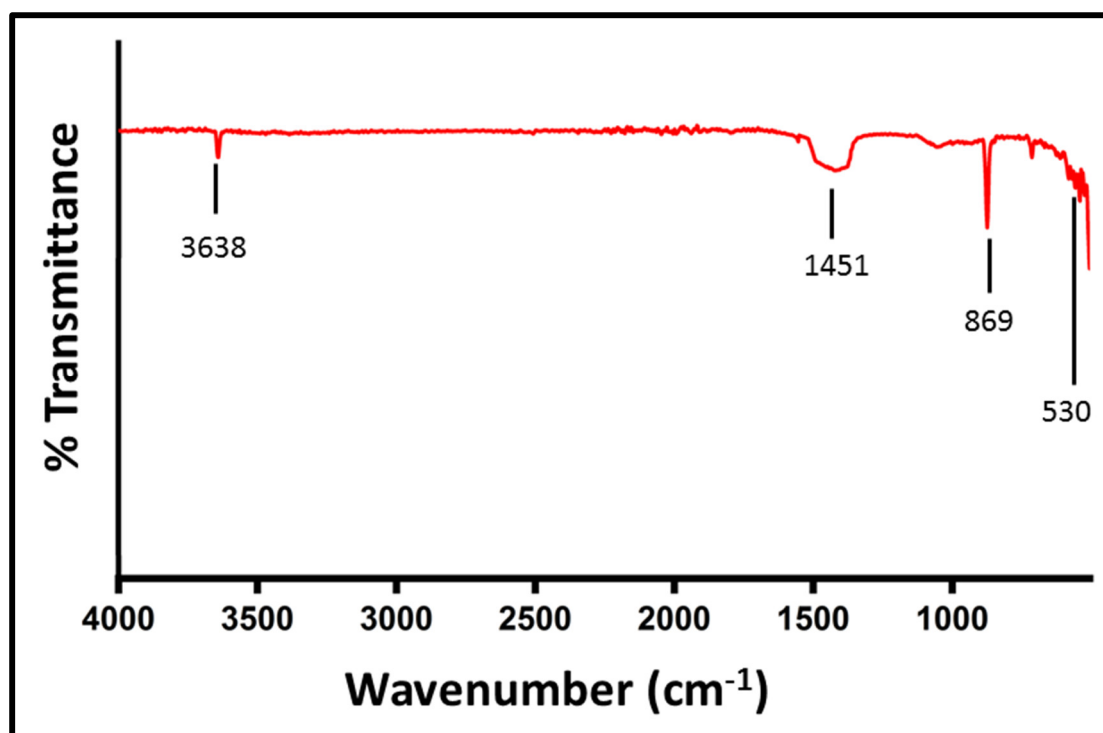

**Figure S7.** FT-IR spectrum of reused CaO catalyst after 5 reaction cycles.

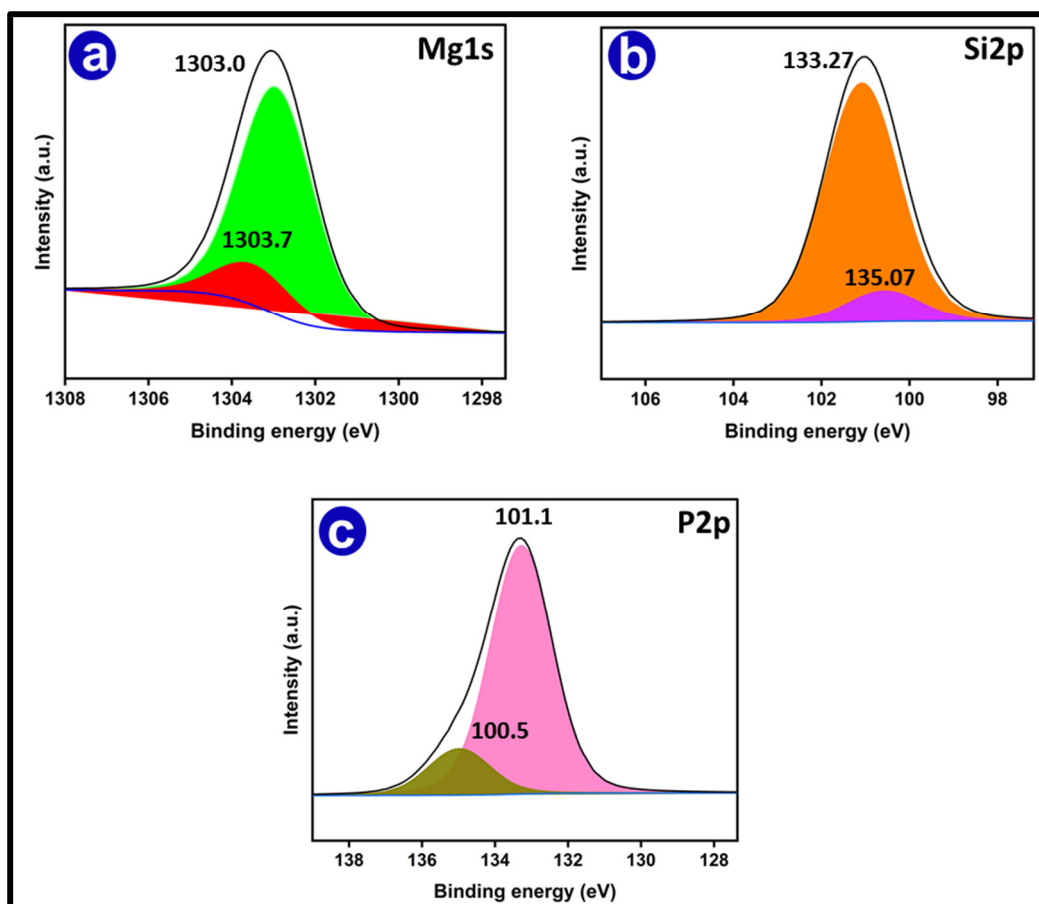

**Figure S8.** XPS deconvolution spectra of (a) magnesium (Mg1s) (b) silicon (Si2p) (c) phosphorus (P2p).
