# Supplementary material for: Biodiesel Production Using a Banana Peel Extract-Mediated Highly Basic Heterogeneous Nanocatalyst
Source: MDPI journal article supplement (doi:10.3390/su151411332), 2023-07-20
Supplement: s1 [file s1]

Archive with 1 entries (1 files):
- sustainability-2477429-supplementary.pdf
